# Supplementary material for: Tropical mobola plum (Parinari Curatellifolia): a full characterization of wood and bark within the scope of biorefineries
Source: Springer Nature journal article supplement (doi:10.1007/s00107-024-02074-2), 2024-04-07
Supplement: MOESM1 [file 26957606]

***Supplementary information***

SI 1. Identification and quantification of the pyrolysis analysis from wood and cork of *Parinari curatellifolia* (% of total area).

| Peak nº | RT | Compound | Origin | Wood 1 | Wood 2 | Wood 3 | Average ± STDEV | Bark 1 | Bark 2 | Bark 3 | Average ± STDEV |
| --- | --- | --- | --- | --- | --- | --- | --- | --- | --- | --- | --- |
| 1 | 5.95 | 2-oxo-propanal | c | 2.7 | 2.5 | 2.7 | 2.6 ± 0.10 | 2.7 | 2.9 | 2.6 | 2.8 ± 0.14 |
| 2 | 7.75 | hydroxyacetaldehyde | c | 5.0 | 4.5 | 4.9 | 4.8 ± 0.27 | 3.4 | 3.2 | 3.4 | 3.4 ± 0.12 |
| 3 | 8.32 | acetic acid | c | 4.5 | 3.7 | 3.7 | 4.0 ± 0.48 | 4.5 | 5.2 | 4.4 | 4.7 ± 0.45 |
| 4 | 8.94 | 1-hydroxy-2-propanone (acetol) | c | 1.8 | 1.7 | 1.6 | 1.7 ± 0.11 | 1.3 | 1.2 | 1.1 | 1.2 ± 0.09 |
| 5 | 9.35 | HOCH=CHOH | c | 0.3 | 0.3 | 0.4 | 0.3 ± 0.01 | 0.3 | 0.3 | 0.3 | 0.3 ± 0.01 |
| 6 | 10.33 | CH2=CH-CO-O-CH3 | c | 0.3 | 0.3 | 0.3 | 0.3 ± 0.01 | 0.2 | 0.2 | 0.3 | 0.3 ± 0.03 |
| 7 | 10.45 | 1,2-ethanediol | c | 0.7 | 0.6 | 0.7 | 0.7 ± 0.05 | 0.6 | 0.6 | 0.5 | 0.6 ± 0.05 |
| 8 | 10.65 | 3-hydroxypropanal (CHO-CH2-CH2OH) | c | 2.1 | 1.8 | 1.9 | 1.9 ± 0.15 | 1.7 | 1.9 | 1.7 | 1.8 ± 0.15 |
| 9 | 10.82 | CH2=CH-CO-CHO | c | 0.3 | 0.3 | 0.3 | 0.3 | 0.1 | 0.2 | 0.2 | 0.2 ± 0.01 |
| 10 | 10.96 | 2(5*H*)-furanone | c | 0.3 | 0.3 | 0.3 | 0.3 ± 0.01 | 0.2 | 0.2 | 0.2 | 0.2 ± 0.02 |
| 11 | 11.15 | 3-Methyl-2(5*H*)-furanone | c | 0.2 | 0.0 | 0.0 | 0.1 ± 0.09 | n.d | n.d | n.d |  |
| 12 | 11.23 | 2(3H)-furanone & 3-furaldehyde | c | 0.5 | 0.6 | 0.6 | 0.6 ± 0.06 | 0.4 | 0.6 | 0.6 | 0.5 ± 0.08 |
| 13 | 11.41 | CH3-CO-CHOH-CHO | c | 1.6 | 1.5 | 1.6 | 1.6 ± 0.04 | 1.1 | 1.2 | 1.2 | 1.2 ± 0.03 |
| 14 | 11.47 | succindialdehyde | c | 0.8 | 0.8 | 0.8 | 0.8 | 0.6 | 0.6 | 0.5 | 0.6 ± 0.04 |
| 15 | 11.78 | furfural & 2-cyclopenten-1-one | c | 1.4 | 1.3 | 1.4 | 1.4 ± 0.08 | 1.5 | 1.8 | 1.5 | 1.6 ± 0.16 |
| 16 | 12.41 | furfuryl alcohol | c | 0.2 | 0.2 | 0.2 | 0.2 | 0.2 | 0.2 | 0.2 | 0.2 ± 0.01 |
| 17 | 12.44 | 5-methyl-2(3*H*)-furanone (angelica lactone) & 1-acetoxy-propan-2-one | c | 0.3 | 0.3 | 0.3 | 0.3 ± 0.01 | 0.4 | 0.3 | 0.3 | 0.3 ± 0.04 |
| 18 | 12.87 | 5-methyl-2(5*H*)-furanone (β-Angelica lactone) | c | 0.2 | 0.2 | 0.2 | 0.2 ± 0.01 | 0.1 | 0.2 | 0.1 | 0.1 ± 0.03 |
| 19 | 13.37 | 4-cyclopentene-1,3-dione | c | 0.2 | 0.2 | 0.2 | 0.2 ± 0.01 | 0.2 | 0.2 | 0.2 | 0.2 ± 0.02 |
| 20 | 13.72 | 2-hydroxy-2-cyclopenten-1-one | c | 1.7 | 1.4 | 1.4 | 1.5 ± 0.15 | 1.3 | 1.2 | 1.2 | 1.2 ± 0.08 |
| 21 | 14.21 | similar to 2-cyclohexen-1-ol | c | 0.7 | 0.6 | 0.7 | 0.7 ± 0.01 | 0.6 | 0.6 | 0.6 | 0.6 ± 0.03 |
| 22 | 14.36 | 5-methylfurfural | c | 0.4 | 0.4 | 0.4 | 0.4 ± 0.01 | 0.4 | 0.4 | 0.5 | 0.4 ± 0.08 |
| 23 | 14.36 | Not identified sugar | c | 0.4 | 0.4 | 0.4 | 0.4 ± 0.01 | 0.4 | 0.4 | 0.5 | 0.4 ± 0.08 |
| 24 | 15.01 | 2(5*H*)-furanone | c | 0.8 | 0.7 | 0.8 | 0.8 ± 0.02 | 0.6 | 0.6 | 0.6 | 0.6 ± 0.05 |
| 25 | 15.29 | 4-hydroxy-5,6-dihydro-(2*H*)-pyran-2-one | c | 1.9 | 1.7 | 1.8 | 1.8 ± 0.11 | 2.0 | 2.0 | 2.2 | 2.1 ± 0.15 |
| 26 | 15.78 | 3-methyl-1,2-cyclopentanedione | c | 0.9 | 0.8 | 0.7 | 0.8 ± 0.09 | 0.6 | 0.6 | 0.6 | 0.6 |
| 27 | 15.83 | 2H-pyran-2,6(3*H*)-dione | c | 0.6 | 0.5 | 0.5 | 0.5 ± 0.05 | 0.5 | 0.5 | 0.5 | 0.5 ± 0.03 |
| 28 | 16.18 | phenol | H | 0.2 | 0.2 | 0.2 | 0.2 ± 0.01 | 0.4 | 0.7 | 0.4 | 0.5 ± 0.17 |
| 29 | 16.82 | guaiacol | G | 1.2 | 1.4 | 1.5 | 1.4 ± 0.15 | 1.9 | 2.1 | 1.9 | 2.0 ± 0.08 |
| 30 | 17.22 | o-cresol | H | 0.1 | 0.1 | 0.1 | 0.1 ± 0.01 | 0.2 | 0.2 | 0.2 | 0.2 ± 0.01 |
| 31 | 17.22 | Not identified sugar | c | 0.1 | 0.1 | 0.1 | 0.1 ± 0.01 | 0.2 | 0.2 | 0.2 | 0.2 ± 0.01 |
| 32 | 17.73 | methyl-butyraldehyde derivative | c | 0.4 | 0.4 | 0.4 | 0.4 ± 0.02 | 0.4 | 0.3 | 0.3 | 0.4 ± 0.04 |
| 33 | 17.97 | orcinol | L | 0.2 | 0.3 | 0.2 | 0.2 ± 0.01 | 0.2 | 0.2 | 0.5 | 0.3 ± 0.15 |
| 34 | 17.97 | p- & m-cresol | H | 0.2 | 0.3 | 0.2 | 0.2 ± 0.01 | 0.5 | 0.8 | 0.3 | 0.5 ± 0.27 |
| 35 | 18.50 | 5-hydroxymethyldihydrofuran-2-one | c | 0.7 | 0.7 | 0.6 | 0.7 ± 0.07 | 0.5 | 0.4 | 0.5 | 0.5 ± 0.03 |
| 36 | 18.98 | 4-methylguaiacol | G | 1.3 | 1.8 | 1.7 | 1.6 ± 0.26 | 2.1 | 2.4 | 2.2 | 2.2 ± 0.16 |
| 37 | 19.21 | 3,5-dihydroxy-2-methyl-4H-pyran-4-one | c | 0.8 | 0.7 | 0.7 | 0.7 ± 0.06 | 0.6 | 0.5 | 0.5 | 0.5 ± 0.02 |
| 38 | 20.77 | 4-ethylguaiacol | G | 0.2 | 0.3 | 0.3 | 0.3 ± 0.04 | 0.4 | 0.6 | 0.4 | 0.5 ± 0.07 |
| 39 | 20.94 | Not identified sugar | c | 2.1 | 1.6 | 2.1 | 2.0 ± 0.29 | 1.7 | 1.8 | 1.4 | 1.7 ± 0.20 |
| 40 | 21.51 | 1,4:3,6-dianhydro-α-d-glucopyranose | c | 0.3 | 0.3 | 0.3 | 0.3 ± 0.03 | 0.3 | 0.3 | 0.2 | 0.2 ± 0.02 |
| 41 | 21.73 | 4-vinylphenol | H | 0.2 | 0.0 | 0.0 | 0.1 ± 0.14 | 0.1 | 0.2 | 0.0 | 0.1 ± 0.09 |
| 42 | 21.99 | 4-vinylguaiacol | G | 2.4 | 2.7 | 2.7 | 2.6 ± 0.16 | 3.6 | 3.8 | 3.5 | 3.6 ± 0.12 |
| 43 | 22.50 | eugenol | G | 0.5 | 0.7 | 0.7 | 0.6 ± 0.10 | 0.8 | 0.9 | 0.8 | 0.8 ± 0.07 |
| 44 | 22.56 | 4-propylguaiacol | G | 0.1 | 0.1 | 0.1 | 0.1 ± 0.02 | 0.1 | 0.1 | 0.1 | 0.1 ± 0.01 |
| 45 | 22.69 | 5-Hydrxoymethylfurfural | c | 1.3 | 1.2 | 1.3 | 1.2 ± 0.06 | 0.9 | 0.9 | 0.9 | 0.9 ± 0.02 |
| 46 | 22.76 | catechol (1,2-benzenediol) | L | 0.8 | 0.8 | 0.9 | 0.8 ± 0.02 | 1.7 | 1.7 | 1.9 | 1.7 ± 0.13 |
| 47 | 23.07 | syringol | S | 1.3 | 1.1 | 0.9 | 1.1 ± 0.15 | 0.9 | 0.9 | 0.8 | 0.9 ± 0.05 |
| 48 | 23.65 | *cis*-isoeugenol | G | 0.3 | 0.4 | 0.4 | 0.3 ± 0.05 | 0.5 | 0.6 | 0.5 | 0.5 ± 0.04 |
| 49 | 23.71 | 3-methoxy-5-methylphenol | L | 0.2 | 0.2 | 0.2 | 0.2 ± 0.02 | 0.2 | 0.3 | 0.2 | 0.2 ± 0.01 |
| 50 | 24.28 | 2-hydroxymethyl-5-hydroxy-2,3-dihydro-(4*H*)-pyran-4-one | c | 1.4 | 1.3 | 1.4 | 1.4 ± 0.06 | 0.7 | 0.6 | 1.1 | 0.8 ± 0.24 |
| 51 | 24.37 | 3-methyl-1,2-benzenediol | L | 0.3 | 0.0 | 0.4 | 0.2 ± 0.18 | 0.9 | 1.0 | 1.0 | 1.0 ± 0.04 |
| 52 | 24.59 | 1,5-anhydro-B-D-xylofuranose | c | 0.7 | 0.5 | 0.6 | 0.6 ± 0.09 | 1.0 | 0.9 | 1.0 | 1.0 ± 0.07 |
| 53 | 24.70 | *trans*-isoeugenol | G | 1.5 | 1.8 | 1.8 | 1.7 ± 0.17 | 2.3 | 2.5 | 2.2 | 2.3 ± 0.16 |
| 54 | 24.92 | 4-methylsyringol | S | 0.8 | 0.7 | 0.7 | 0.7 ± 0.08 | 0.7 | 0.7 | 0.6 | 0.7 ± 0.03 |
| 55 | 25.25 | vanillin | G | 1.3 | 1.8 | 1.8 | 1.6 ± 0.28 | 1.6 | 1.8 | 1.6 | 1.7 ± 0.15 |
| 56 | 25.53 | 1-(4-hydroxy-3-methoxyphenyl)propyne | G | 0.6 | 0.6 | 0.7 | 0.7 ± 0.07 | 0.8 | 1.0 | 0.7 | 0.8 ± 0.16 |
| 57 | 25.74 | 1-(4-hydroxy-3-methoxyphenyl)propyne | G | 0.3 | 0.4 | 0.5 | 0.4 ± 0.06 | 0.5 | 0.5 | 0.4 | 0.5 ± 0.04 |
| 58 | 26.38 | homovanillin | G | 1.2 | 1.4 | 1.4 | 1.3 ± 0.12 | 1.1 | 0.8 | 1.2 | 1.0 ± 0.18 |
| 59 | 26.68 | vanillic acid methyl ester | G | 0.2 | 0.0 | 0.2 | 0.1 ± 0.11 | 0.0 | 0.2 | 0.2 | 0.1 ± 0.13 |
| 60 | 26.74 | Not identified compound | O | 0.2 | 0.3 | 0.2 | 0.2 ± 0.06 | 0.0 | 0.2 | 0.2 | 0.1 ± 0.13 |
| 61 | 26.85 | acetoguaiacone | G | 0.9 | 1.2 | 1.2 | 1.1 ± 0.19 | 1.1 | 1.2 | 1.1 | 1.1 ± 0.07 |
| 62 | 26.95 | 1,6-anhydro-α-D-galactopyranose | c | 0.3 | 0.3 | 0.2 | 0.3 ± 0.05 | 0.4 | 0.4 | 0.4 | 0.4 |
| 63 | 27.51 | 4-vinylsyringol | S | 1.4 | 1.1 | 1.0 | 1.2 ± 0.25 | 1.0 | 0.9 | 0.9 | 1.0 ± 0.06 |
| 64 | 27.81 | guaiacylacetone | G | 0.3 | 0.4 | 0.4 | 0.4 ± 0.05 | 0.4 | 0.5 | 0.5 | 0.5 ± 0.01 |
| 65 | 27.86 | 4-allylsyringol | S | 0.4 | 0.3 | 0.3 | 0.3 ± 0.07 | 0.3 | 0.3 | 0.3 | 0.3 ± 0.02 |
| 66 | 28.13 | Not identified compound | O | 0.2 | 0.2 | 0.0 | 0.1 ± 0.12 | 0.2 | 0.2 | 0.2 | 0.2 ± 0.01 |
| 67 | 28.27 | Not identified sugar | c | 0.5 | 0.4 | 0.5 | 0.4 ± 0.08 | 0.3 | 0.3 | 0.3 | 0.3 ± 0.02 |
| 68 | 28.41 | propioguaiacone | G | 0.2 | 0.2 | 0.2 | 0.2 ± 0.02 | 0.3 | 0.3 | 0.3 | 0.3 ± 0.02 |
| 69 | 28.66 | coniferyl alcohol isomer & guaiacyl vinyl ketone | G | 0.8 | 1.1 | 1.1 | 1.0 ± 0.16 | 0.9 | 0.9 | 1.0 | 1.0 ± 0.02 |
| 70 | 28.83 | *cis*-4-propenylsyringol | S | 0.1 | 0.1 | 0.1 | 0.1 ± 0.01 | 0.2 | 0.2 | 0.1 | 0.1 ± 0.02 |
| 71 | 28.83 | alpha-oxy-propioguaiacone | G | 0.1 | 0.1 | 0.1 | 0.1 ± 0.01 | 0.2 | 0.2 | 0.1 | 0.1 ± 0.02 |
| 72 | 29.70 | 1,6-anhydro-β-D-glucopyranose (levoglucosan) | c | 9.8 | 8.1 | 8.5 | 8.8 ± 0.87 | 7.9 | 7.4 | 7.5 | 7.6 ± 0.24 |
| 73 | 29.79 | 4-propinylsyringol | S | 0.2 | 0.1 | 0.2 | 0.2 ± 0.08 | 0.2 | 0.1 | 0.1 | 0.1 ± 0.02 |
| 74 | 29.92 | *trans*-4-propenylsyringol | S | 1.0 | 0.9 | 0.8 | 0.9 ± 0.14 | 0.8 | 0.8 | 0.8 | 0.8 ± 0.05 |
| 75 | 30.08 | dihydroconiferyl alcohol | G | 0.4 | 0.5 | 0.5 | 0.5 ± 0.06 | 0.8 | 0.9 | 0.8 | 0.8 ± 0.02 |
| 76 | 30.56 | syringaldehyde | S | 1.3 | 0.9 | 0.8 | 1.0 ± 0.28 | 0.7 | 0.5 | 0.6 | 0.6 ± 0.10 |
| 77 | 30.56 | *cis*-coniferyl alcohol | G | 0.3 | 0.9 | 0.8 | 0.7 ± 0.29 | 0.7 | 0.5 | 0.6 | 0.6 ± 0.10 |
| 78 | 31.30 | homosyringaldehyde | S | 0.4 | 0.2 | 0.2 | 0.3 ± 0.09 | 0.2 | 0.0 | 0.0 | 0.1 ± 0.10 |
| 79 | 31.63 | anhydrosugar sugar | c | 1.9 | 1.7 | 1.9 | 1.9 ± 0.11 | 1.6 | 1.5 | 1.6 | 1.6 ± 0.09 |
| 80 | 31.75 | acetosyringone | S | 0.6 | 0.5 | 0.4 | 0.5 ± 0.07 | 0.4 | 0.4 | 0.4 | 0.4 ± 0.02 |
| 81 | 32.04 | *trans*-coniferyl alcohol | G | 3.6 | 4.9 | 5.2 | 4.5 ± 0.82 | 3.8 | 0.6 | 3.4 | 2.6 ± 1.71 |
| 82 | 32.46 | syringylacetone | S | 1.0 | 1.3 | 1.3 | 1.2 ± 0.16 | 0.0 | 0.0 | 0.3 | 0.1 ± 0.14 |
| 83 | 32.46 | *trans*-coniferaldehyde | G | 1.0 | 1.3 | 1.3 | 1.2 ± 0.16 | 2.6 | 2.9 | 2.3 | 2.6 ± 0.33 |
| 84 | 33.28 | *trans-*sinapyl alcohol | S | 0.3 | 0.1 | 0.2 | 0.2 ± 0.10 | 0.2 | 0.0 | 0.0 | 0.1 ± 0.09 |
| 85 | 36.69 | *trans*-sinapaldehyde | S | 1.5 | 0.2 | 1.0 | 0.9 | 1.0 | 0.7 | 0.7 | 0.8 ± 0.21 |
|  |  | **total identified (% of total chromatographic area)** |  | **83.1** | **79.0** | **82.1** | 81.4 ± 2.14 | **80.0** | **79.1** | **78.2** | 79.1 ± 0.87 |
|  |  | **Total carbohydrates (C)** |  | **51.0** | **44.9** | **47.2** | **47.7 ± 3.05** | **42.5** | **43.0** | **42.0** | **42.5 ± 0.51** |
|  |  | **Total lignin (L)** |  | **30.2** | **32.2** | **33.0** | **31.8 ± 1.45** | **34.3** | **32.5** | **32.3** | **33.0 ± 1.09** |
|  |  | **H** |  | **0.8** | **0.6** | **0.6** | **0.7 ± 0.14** | **1.2** | **1.9** | **0.9** | **1.3 ± 0.52** |
|  |  | **G** |  | **18.9** | **24.1** | **24.5** | **22.5 ± 3.12** | **26.5** | **25.3** | **25.7** | **25.9 ± 0.62** |
|  |  | **S** |  | **10.4** | **7.4** | **7.8** | **8.5 ± 1.58** | **6.4** | **5.2** | **5.6** | **5.7 ± 0.61** |
|  |  | **Other LDC** |  | **1.6** | **1.4** | **1.7** | **1.5 ± 0.16** | **3.0** | **3.1** | **3.6** | **3.2 ± 0.30** |
|  |  | **others** |  | **0.4** | **0.5** | **0.2** | **0.4 ± 0.16** | **0.2** | **0.4** | **0.4** | **0.3 ± 0.12** |
|  |  | **S/G ratio** |  | **0.55** | **0.31** | **0.32** | **0.4 ± 0.13** | **0.24** | **0.21** | **0.22** | **0.2 ± 0.02** |
|  |  | **C/L ratio** |  | **1.6** | **1.3** | **1.4** | **1.4 ± 0.15** | **1.1** | **1.2** | **1.2** | **1.2 ± 0.03** |

RT – retention time (min); Origin: c – carbohydrates derivatives; L - lignin derivatives not assigned to H, G OR S-units; S – syringyl lignin units; G – guaiacyl lignin units; H – *p*-hydroxyphenyl lignin units; Other LDC – other compounds from lignin but not assigned to H, G, S-units.
